# Supplementary material for: Motivations of children and their parents to participate in drug research: a systematic review
Source: Springer Nature journal article supplement (doi:10.1007/s00431-016-2715-9), 2016-04-04
Supplement: MOESM3 [file 10019548]

### Extra supplemental material 3

#### Data extraction form

| Relevant aspect                                               | Study No.:                                                                                                                                  |                                                                                                                                               |
|---------------------------------------------------------------|---------------------------------------------------------------------------------------------------------------------------------------------|-----------------------------------------------------------------------------------------------------------------------------------------------|
| Author and year                                               |                                                                                                                                             |                                                                                                                                               |
| Type of study                                                 | <input type="checkbox"/> Qualitative study: ...<br><input type="checkbox"/> Quantitative study: ...                                         |                                                                                                                                               |
| Setting (description)                                         |                                                                                                                                             |                                                                                                                                               |
| - Moment of questioning related to decision and participation |                                                                                                                                             |                                                                                                                                               |
| - real life / hypothetical research / research in general     |                                                                                                                                             |                                                                                                                                               |
| - therapeutic / non therapeutic                               |                                                                                                                                             |                                                                                                                                               |
| - parents and /or children                                    |                                                                                                                                             |                                                                                                                                               |
| - separate analysis of parents and children?                  |                                                                                                                                             |                                                                                                                                               |
| - consenters / non consenters                                 |                                                                                                                                             |                                                                                                                                               |
| Study for which participation is asked                        |                                                                                                                                             |                                                                                                                                               |
| Study population                                              |                                                                                                                                             |                                                                                                                                               |
| Number of participants                                        |                                                                                                                                             |                                                                                                                                               |
| Inclusion criteria                                            |                                                                                                                                             |                                                                                                                                               |
| Exclusion criteria                                            |                                                                                                                                             |                                                                                                                                               |
| Patient characteristics                                       |                                                                                                                                             |                                                                                                                                               |
| Objective/ hypothesis                                         |                                                                                                                                             |                                                                                                                                               |
| Methods                                                       |                                                                                                                                             |                                                                                                                                               |
| Motivating factors                                            | Parents:                                                                                                                                    | Children:                                                                                                                                     |
| Discouraging factors                                          | Parents:                                                                                                                                    | Children:                                                                                                                                     |
| Other outcome measures                                        |                                                                                                                                             |                                                                                                                                               |
| Possible confounders                                          |                                                                                                                                             |                                                                                                                                               |
| Critical appraisal (including risk of bias) <sup>a</sup>      |                                                                                                                                             |                                                                                                                                               |
| Level of evidence <sup>b</sup>                                | Quantitative study:<br><input type="checkbox"/> A<br><input type="checkbox"/> B<br><input type="checkbox"/> C<br><input type="checkbox"/> D | Qualitative study:<br><input type="checkbox"/> ++<br><input type="checkbox"/> +<br><input type="checkbox"/> +/-<br><input type="checkbox"/> - |

<sup>a</sup> With use of the Critical Appraisal Skills Programme (CASP) checklists [11];

<sup>b</sup> Levels according those set by the Dutch Institute for Healthcare Improvement (CBO)
